# Supplementary material
Source: PubMed Central journal article supplement (PMC4500285)
Supplement: pnas.1506960112.sapp.pdf [file pnas.1506960112.sapp.pdf]

# **Rescue of the Stargardt phenotype in *Abca4* knockout mice through inhibition of vitamin A dimerization**

Short title: **Vitamin A dimerization triggers RPE lipofuscin formation**

Peter Charbel Issa<sup>a,b</sup>, Alun R. Barnard<sup>a</sup>, Philipp Herrmann<sup>b</sup>, Ilyas Washington<sup>c</sup>, Robert E. MacLaren<sup>a,d</sup>

Author affiliation:

- <sup>1.</sup> Nuffield Laboratory of Ophthalmology, Department of Clinical Neurosciences, University of Oxford and Oxford Eye Hospital, University of Oxford, OX3 9DU, Oxford, UK
- <sup>2.</sup> Department of Ophthalmology, University of Bonn, 53127 Bonn, Germany
- <sup>3.</sup> Department of Ophthalmology, Columbia University Medical Center, New York, NY 10032, USA
- <sup>4.</sup> Moorfields Eye Hospital and University College of London Institute of Ophthalmology Biomedical Research Centre, EC1V 2PD, London, UK

**Supporting Information**

## SI Results

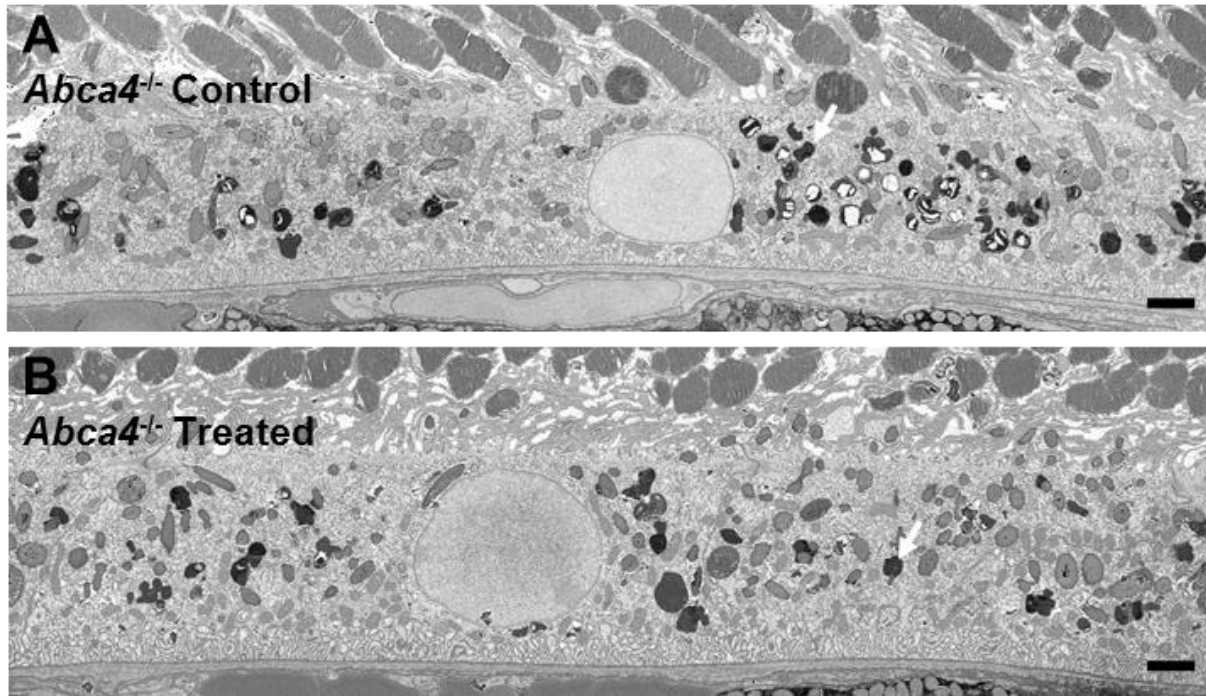

**Fig. S1. Inhibiting vitamin A dimerization prevents lipofuscin granule accumulation in the RPE.** Representative transmission electron micrographs of a RPE cell taken from 9-month old *Abca4*<sup>-/-</sup> mutant mice administered either vitamin A (control, **A**) or C20-D<sub>3</sub>-vitamin A (treated, **B**). Lipofuscin granules were defined as particles that were electron dense, irregular shape and/or granular and limited by a single membrane. White arrows point to representative lipofuscin granule. Scale bar is approximately one micrometer.

**Table S1. One-way analysis of variance results.**

|                | <b>WT<br/>Control</b> | <b>WT<br/>Treated</b> | <b>-/-<br/>Control</b> | <b>-/-<br/>Treated</b> |
|----------------|-----------------------|-----------------------|------------------------|------------------------|
| Minimum        | 8                     | 7                     | 29                     | 15                     |
| 25% Percentile | 8                     | 7                     | 29                     | 15                     |
| Median         | 9                     | 7                     | 31                     | 16                     |
| 75% Percentile | 10                    | 7                     | 32                     | 16                     |
| Maximum        | 10                    | 7                     | 32                     | 16                     |
|                |                       |                       |                        |                        |
| Mean           | 9                     | 7                     | 31                     | 16                     |
| Std. Deviation | 1                     | 0                     | 2                      | 0.7                    |
| Std. Error     | 1                     | 0                     | 1                      | 0.5                    |
|                |                       |                       |                        |                        |
| Lower 95% CI   | -4                    | 7                     | 11                     | 9                      |
| Upper 95% CI   | 22                    | 7                     | 50                     | 22                     |

| <b>Bonferroni's Multiple<br/>Comparison Test</b> | <b>Mean<br/>Diff.</b> | <b>t</b> | <b>Significant?<br/>P &lt; 0.05?</b> | <b>Summary</b> | <b>95% CI of<br/>diff</b> |
|--------------------------------------------------|-----------------------|----------|--------------------------------------|----------------|---------------------------|
| WT Control vs WT Treated                         | 2                     | 2        | No                                   | ns             | -4 to 8                   |
| WT Control vs -/- Control                        | -22                   | 16       | Yes                                  | ***            | -28 to -15                |
| WT Control vs -/- Treated                        | -7                    | 5        | Yes                                  | *              | -13 to -0.08              |
| WT Treated vs -/- Control                        | -24                   | 18       | Yes                                  | ***            | -30 to -17                |
| WT Treated vs -/- Treated                        | -9                    | 6        | Yes                                  | *              | -15 to -2                 |
| -/- Control vs -/- Treated                       | 15                    | 11       | Yes                                  | **             | 9 to 21                   |

Values represent lipofuscin volume ( $\mu\text{M}^3$ ) per  $10 \mu\text{M}^3$  of RPE cell cytoplasm as shown in Fig. 2C.

**-/-:** *Abca4*<sup>-/-</sup> mutant mice

**WT:** wild type (*Abca4*<sup>+/+</sup>) controls

**Treated:** C20-D<sub>3</sub>-vitamin A diet

**Control:** normal rodent chow

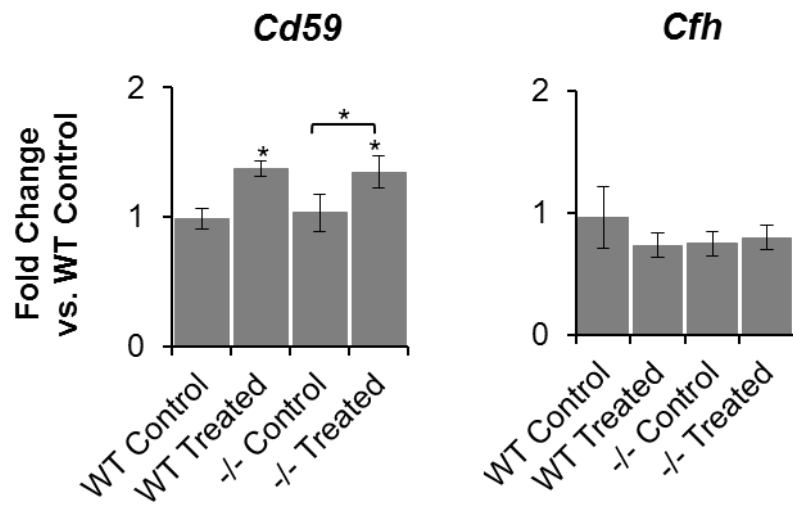

**Fig. S2. C20-D<sub>3</sub>-vitamin alters transcription of complement genes**

Quantification of mRNA from 9-month old wild type and *Abca4*<sup>-/-</sup> mice administered either vitamin A (control) or C20-D<sub>3</sub>-vitamin A from weaning (treated). To generate each bar, total RNA was extracted from between 5 to 10 eyes. *Cfh*: complement factor h; *Cd59*: MAC-inhibitory protein; -/-: *Abca4*<sup>-/-</sup> mutant mice WT: wild type controls.

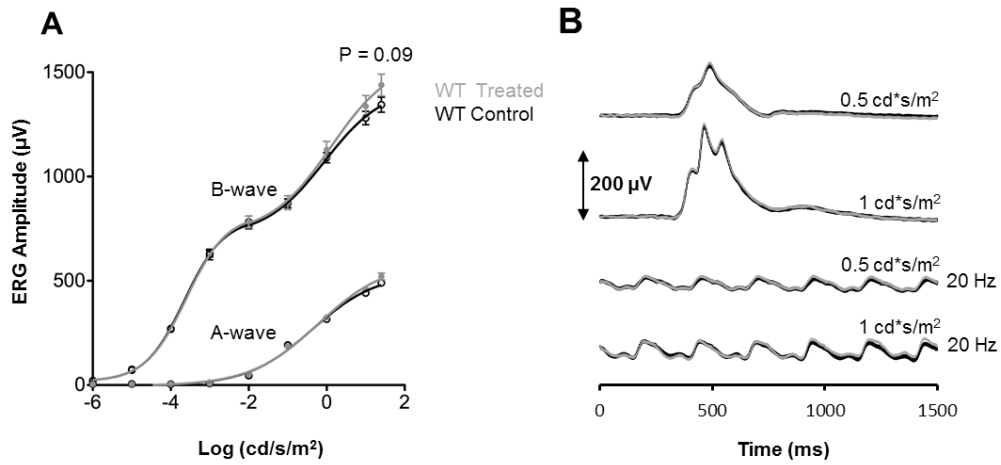

**Fig. S3. Long-term inhibition of vitamin A dimerization by C20-D<sub>3</sub>-vitamin A does not compromise retinal function in wild-type mice. (A)** Average dark-adapted A- and B-wave amplitudes in response to flashes of light of increasing intensity. **(B)** Average light-adapted, B-wave amplitudes with amplitudes elicited by light flickering at 20 Hz. Mice from weaning were given a standard rodent chow (control) or one where vitamin A was replaced with C20-D<sub>3</sub>-vitamin A (treated) to 9-month of age. All curves represent average values with standard deviations for 10 eyes (n =10). WT: wild type (*Abca4*<sup>+/+</sup>). All ERG responses were identical between the two cohorts.

## SI Methods

**Table S2.** Primers used for quantitative reverse transcription polymerase chain reaction (RTqPCR)

|             |     |                          |
|-------------|-----|--------------------------|
| <i>C3</i>   | Fwd | CGGCAAGTTTCTGAACACAG     |
|             | Rev | GAGTCAAAGTCTTTCAGCAGCA   |
| <i>CfB</i>  | Fwd | GCTCAACCAAATCAGTTATGAAGA |
|             | Rev | CGGGTTCTATTCCAGCCTTC     |
| <i>Cfp</i>  | Fwd | TCTTGAGTGGCAGCTACAGG     |
|             | Rev | CAGACCAGCCACCCATCT       |
| <i>Cd59</i> | Fwd | GATGTGGCTCAAGATAGTGCTG   |
|             | Rev | TTGTGCTGGGCTACCAAAT      |
| <i>CfH</i>  | Fwd | AAATGGGATCCTGAACCAA      |
|             | Rev | CACTTGGGTATTTGGAATCTGC   |

**Electroretinography.** A DTL-type silver-coated nylon thread active electrode was modified to include a custom-made contact lens of clear Aclar film. This was positioned concentrically on the cornea using hypromellose eye drops (1% methylcellulose solution) for coupling. Recordings were always done from the left eye, while the right eye remained undilated and was protected by a contact lens. Platinum needles in the scruff and at the base of the tail served as reference and ground electrodes, respectively. Unfiltered signals were differentially amplified and digitized at a rate of 5 kHz using an Espion E2 system (Diagnosys LLC, Cambridge, UK). The amplitude and latency of major ERG components were measured with the Espion software (Diagnosys LLC) using automated and manual methods. Brief (4 ms) single flash stimuli were delivered in a Ganzfeld dome. Animals were placed on a heated platform, maintained at 38°C using a circulating pump-water bath. All recordings were made in a custom made light-tight Faraday cage.

For light-adapted testing, animals were pre-exposed to steady full-field white background illumination (30 cd/m<sup>2</sup>) for 10 min. Responses were then recorded to light flashes of two intensities (0.5 and 1 log cd.s/m<sup>2</sup>) superimposed on the same background light with an ISI of 2 seconds (0.5 Hz) and 10 responses averaged per result. In addition, responses to 20 Hz flicker at the same two intensities were recorded and traces were averaged 20 times.

In single flash ERGs, the b-wave amplitude (from a-wave trough to b-wave peak) was measured for all ERGs, whereas the a-wave amplitude (from baseline to a-wave trough) was measured only when recognizable as a distinct component (stimulus intensities  $\geq -1$  log cd.s/m<sup>2</sup>). Both amplitudes were measured in unfiltered recordings.

**Table S3.** Summary of ERG flash protocol

| Flash intensity [log cd.s/m <sup>2</sup> ]                                                       | Repetitions | Inter-stimulus interval [sec] | interval after intensity step [sec] |                  |
|--------------------------------------------------------------------------------------------------|-------------|-------------------------------|-------------------------------------|------------------|
| -6                                                                                               | 16          | 5                             | 20                                  | Scotopic testing |
| -5                                                                                               | 16          | 5                             | 20                                  |                  |
| -5                                                                                               | 16          | 5                             | 20                                  |                  |
| -3                                                                                               | 9           | 20                            | 60                                  |                  |
| -2                                                                                               | 9           | 20                            | 60                                  |                  |
| -1                                                                                               | 9           | 20                            | 60                                  |                  |
| 0                                                                                                | 4           | 60                            | 120                                 |                  |
| 1                                                                                                | 1           | ---                           | 120                                 |                  |
| 1.4                                                                                              | 1           | ---                           | 120                                 |                  |
| Pre-exposure: steady full-field white background illumination (30 cd/m <sup>2</sup> ) for 10 min |             |                               |                                     |                  |
| 0.5                                                                                              | 10          | 0.5                           | no fixed interval                   | Photopic testing |
| 1                                                                                                | 10          | 0.5                           | no fixed interval                   |                  |
| 0.5                                                                                              | 20 traces   | 20Hz flicker                  | no fixed interval                   |                  |
| 1                                                                                                | 20 traces   | 20Hz flicker                  | no fixed interval                   |                  |
